# Supplementary material for: Facile hydrothermal synthesis of a tri-metallic Cu–Mn–Ni oxide-based electrochemical pseudo capacitor
Source: Royal Society of Chemistry journal article supplement (doi:10.1039/d4dt00142g), 2024-01-01
Supplement: d4dt00142g1.pdf [file d4dt00142g1.pdf]

**Supporting information**

**Facile hydrothermal synthesis of tri-metallic Cu-Mn-Ni oxides based  
electrochemical pseudocapacitor**

Komal Ali Rao<sup>a</sup>, Muhammad Ehsan Mazhar<sup>a\*</sup>, Javed Ahmad<sup>a</sup>

<sup>a</sup>*Department of Physics Bahauddin Zakariya University, Multan-60800, Pakistan*

## **Electrometrical test and fabrication of working electrode**

CV, EIS, and GCD of the NO, MNO and CMNO based nanocomposites were carried out using a three-electrode arrangement on Metrohm Auto lab (PGSTAT 204) workstation. The platinum (Pt) was used as a counter electrode, whereas the Ag/AgCl was utilized as the reference electrode, the synthesized materials as a working electrode, and 1 KOH as an electrolyte. The homogenous slurry of each sample was obtained by grinding the prepared materials and dissolved in distilled water and deposited on Ni-foams (1 cm × 1 cm) via drop cast technique to fabricate the working electrode and was dried at 45 °C for 24 h. The amount of loaded material was about 0.004 g. The CV curves were traced at a potential window of 0–0.6 V at varying scan rates (5, 10, 15, 20, 25, 30, mVs<sup>-1</sup>). A 0.5 V AC voltage with frequency 0.1 Hz to 1 × 10<sup>5</sup> Hz was employed for EIS. The GCD tests were carried out at 1, 2, 3, 5 and 7 A/g current density.

## **2.6. Characterization**

The phase investigation of the fabricated materials (NO, MNO, and CMNO) was carried out using an X-ray advance diffractometer (Model: Bruker-D8, CuK $\alpha$ :  $\lambda = 1.5407 \text{ \AA}$ : Range  $2\theta = 20\text{--}80^\circ$ , the scanning rate of 1.5°/min, run at 40 kV/35 mA). X-ray photoelectron spectroscopy (XPS) was carried out using a PHI Quantera SXM (ULVAC-PH) with mono-chromated AlK $\alpha$ (1486.7eV) radiation under a pressure of  $4 \times 10^{-8}$  Pa. The Metrohm Autolab (PGSTAT-204) was used for electrochemical measurements. The surface morphology and elemental analysis were performed using Field Emission Scanning Electron Microscope (FE-SEM) (modeled Nova Nano 45).

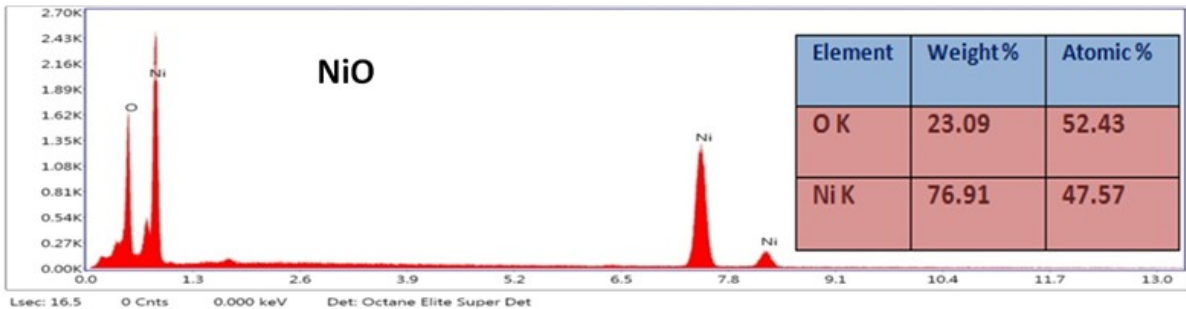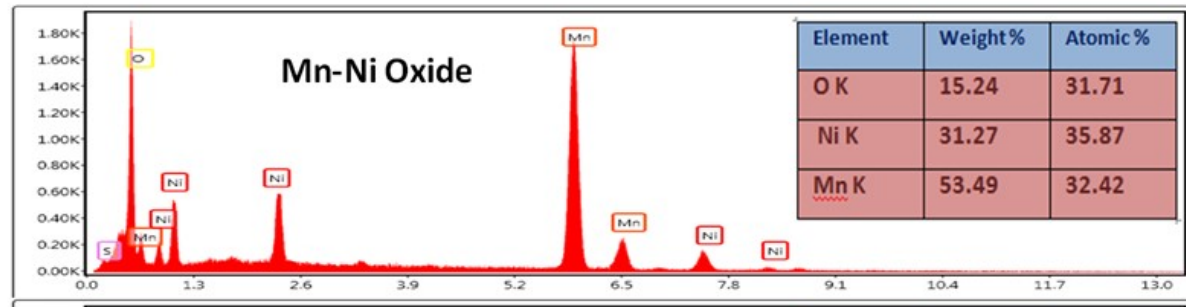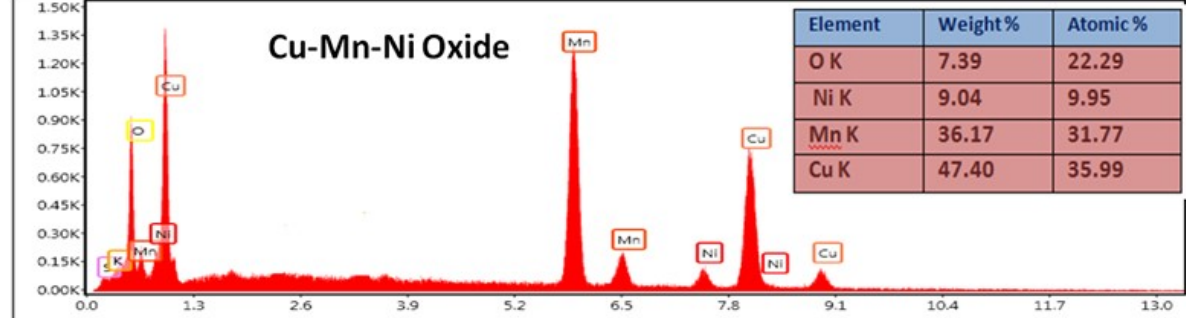

Status: Idle CPS: 10027 DT: 15.0 Lsec: 20.0 0 Cnts 0.000 keV Det: Octane Elite Super

Figure S1 represents the EDX of NO, MNO, CMNO.

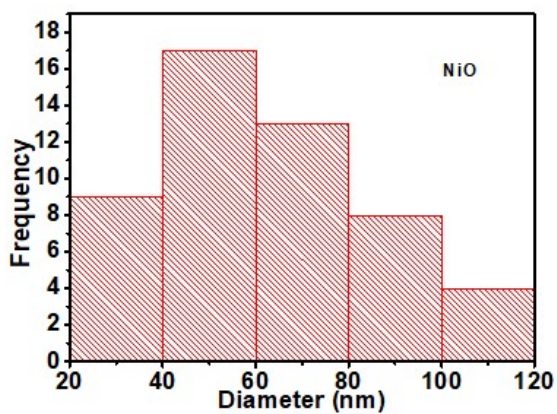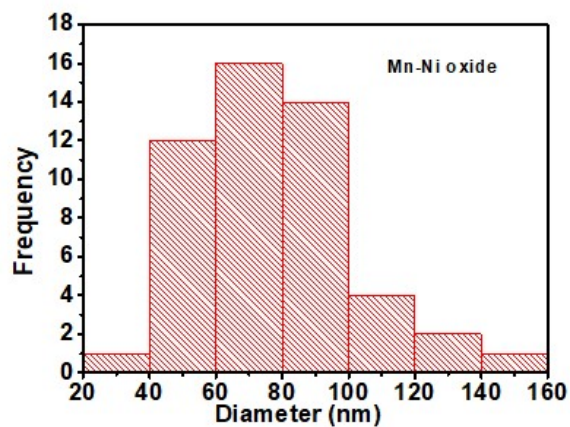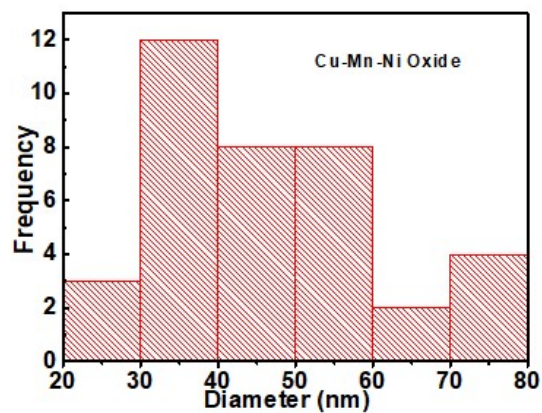

Figure S2 showing diameter of NO, MNO and CMNO.

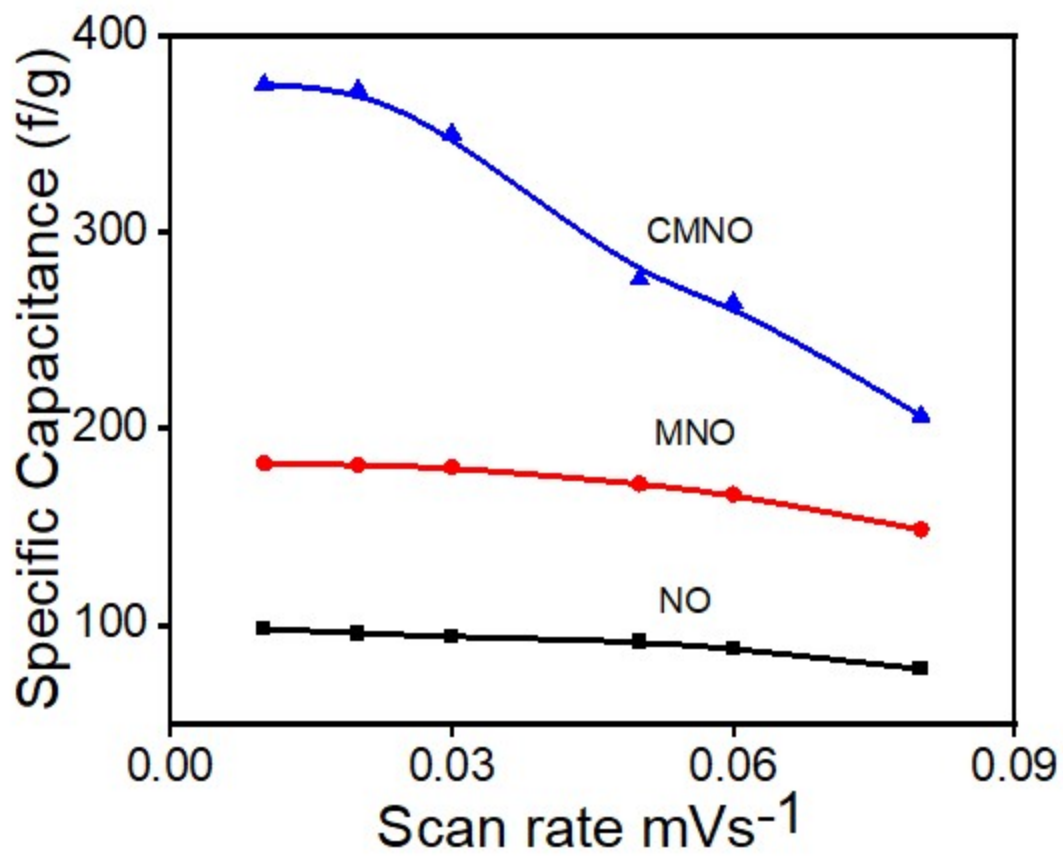

Figure S3 Specific capacitance of NO, MNO, and CMNO calculated from CV.

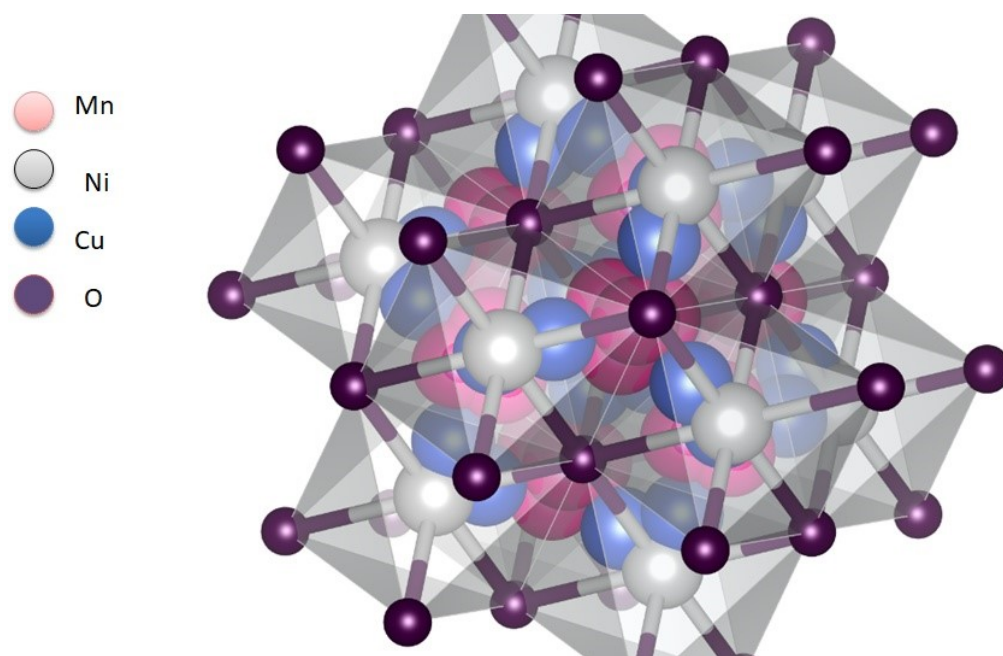

Fig S4 Structural formula representing the compositions of CMNO

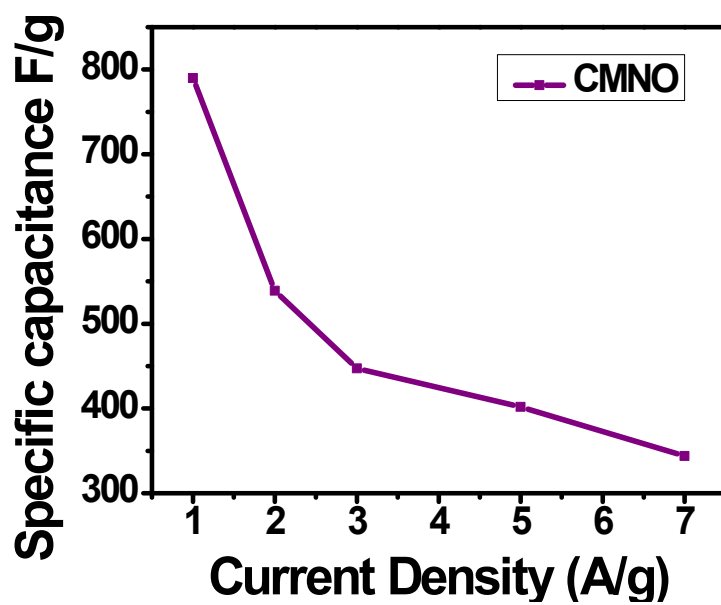

Fig S5 Variation of specific capacitance as a function of current density of CMNO

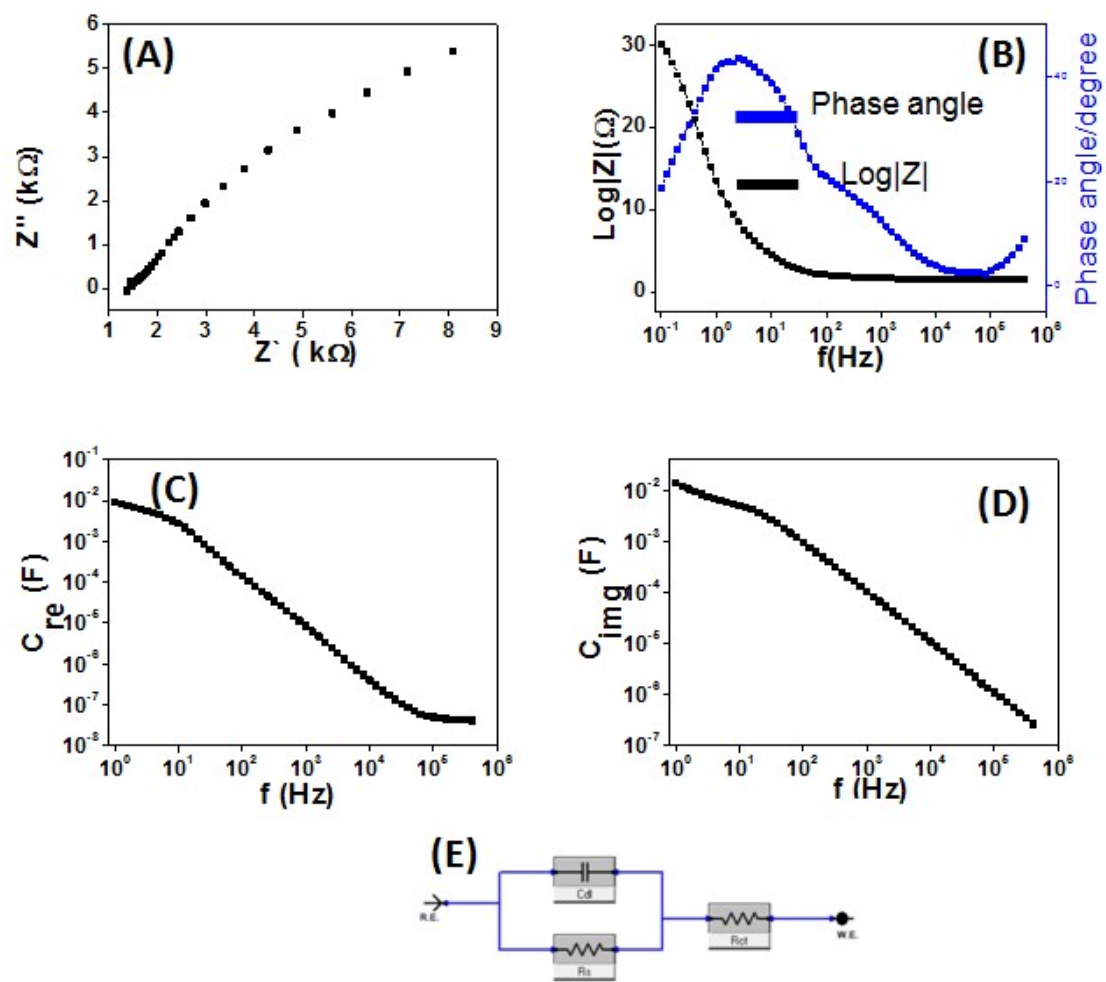

Fig S6 Nyquist plot of CMNO electrode (A), Bode plot (B), plot of Imaginary and real capacitance versus frequency (C&D), Equivalent Circuits (E)

**Table S1:** Specific Capacitance of NO, MNO and CMNO calculated from CV at different scan rate.

| Scan rate (mV/s) | NO Specific capacitance(F/g) | MNO Specific capacitance(F/g) | CMNO Specific capacitance(F/g) |
|------------------|------------------------------|-------------------------------|--------------------------------|
| 10               | 182.49                       | 98.0833                       | 375.68                         |
| 20               | 181.52                       | 95.75                         | 372.91                         |
| 30               | 180.55                       | 94.42                         | 350.50                         |
| 50               | 172.12                       | 91.70                         | 276.34                         |
| 60               | 166.62                       | 88.05                         | 264.40                         |
| 80               | 148.60                       | 77.60                         | 206.72                         |

**Table S2:** Electrochemical Parameters of different Material Compositions from GCD curves at different current densities

| Current density | NO Specific capacitance(F/g) | MNO Specific capacitance(F/g) | CMNO Specific capacitance (F/g) |
|-----------------|------------------------------|-------------------------------|---------------------------------|
| 1 A/g           | 290.84                       | 438.47                        | 790.0                           |
| 2 A/g           | 220.3                        | 359.3                         | 538.98                          |
| 3 A/g           | 213.5                        | 330.50                        | 447.4                           |
| 5 A/g           | 228.81                       | 288.13                        | 401.8                           |
| 7 A/g           | 261.01                       | 272.8                         | 344.0                           |



**Table S3:** Comparison of electrochemical performance of synthesized CMNO in this work and recent reported work.

| Sr.No | Materials                                            | Synthesis Method | Morphology                  | Specific Capacitance | Cyclic stability         | References |
|-------|------------------------------------------------------|------------------|-----------------------------|----------------------|--------------------------|------------|
| 1     | Ni doped CuO/Cu/Cu <sub>2</sub> O                    | Hydrothermal     | Nano-flakes                 | 338.98F/g at 1A/g    | 98% after 5000 cycles    | [1]        |
| 2     | NiO/Ni <sub>6</sub> MnO <sub>8</sub>                 | Hydrothermal     | Porous flower like          | 433 F/g at 1A/g      | 91.9% after 1000 cycles  | [2]        |
| 3     | MnNiO <sub>3</sub> /Ni <sub>6</sub> MnO <sub>8</sub> | Hydrothermal     | 3D flower like              | 423.3F/g at 1A/g     | 100% after 6000 cycles   | [3]        |
| 4     | MnO <sub>2</sub>                                     | Hydrothermal     | Nano rods                   | 577.6 F/g at 1A/g    | 98.1% after 10000 cycles | [4]        |
| 5     | Mn <sub>2</sub> O <sub>3</sub> /CuO                  | Hydrothermal     | Spherical nanoparticles     | 342.85F/g at 1A/g    | 89.97% after 5000 cycles | [5]        |
| 6     | MnO <sub>2</sub> /CuO                                | Hydrothermal     | Sphere shaped nanoparticles | 279.12F/g at 0.5A/g  | 91% after 10000 cycles   | [6]        |
| 7     | Cu doped NiMnO <sub>3</sub>                          | Hydrothermal     | Ir-regular nano sphere      | 659.50F/g at 10mV/s  | -----                    | [7]        |
| 8     | Cu-Mn-NiO <sub>4</sub>                               | Hydrothermal     | Nano rods                   | 790.63F/g at 1A/g    | 96 % after 8000 cycles   | This work  |

1. Kuzhandaivel, H., et al., *Nickel-doped CuO/Cu/Cu<sub>2</sub>O nanocomposite as an efficient electrode for electrochemical non-enzymatic glucose sensor and asymmetric supercapacitor*. *Journal of Applied Electrochemistry*, 2023. **53**(9): p. 1869-1886.
2. Zhang, J., et al., *Synthesis of 3D porous flower-like NiO/Ni<sub>6</sub>MnO<sub>8</sub> composites for supercapacitor with enhanced performance*. *Journal of Materials Science: Materials in Electronics*, 2018. **29**: p. 7510-7518.
3. Guo, W., et al., *Hydrothermal preparation of MnNiO<sub>3</sub>/Ni<sub>6</sub>MnO<sub>8</sub> nanospheres on nickel foam as a high stability electrode material for supercapacitor*. *Journal of Alloys and Compounds*, 2022. **924**: p. 166490.
4. Pandit, B., et al., *One-pot hydrothermal preparation of hierarchical manganese oxide nanorods for high-performance symmetric supercapacitors*. *Journal of Energy Chemistry*, 2022. **65**: p. 116-126.
5. Joysi, M.G., et al., *Manganese Oxide-Enriched Copper Oxide (Mn<sub>2</sub>O<sub>3</sub>/CuO) Nanocomposite Electrodes for Supercapacitor Application*. *Arabian Journal for Science and Engineering*, 2024: p. 1-11.
6. Racik, K.M., et al., *Fabrication of manganese oxide decorated copper oxide (MnO<sub>2</sub>/CuO) nanocomposite electrodes for energy storage supercapacitor devices*. *Physica E: Low-dimensional Systems and Nanostructures*, 2020. **119**: p. 114033.
7. Upadhyay, S., I. Assadullah, and R. Tomar, *Hydrothermally grown Cu doped NiMnO<sub>3</sub> perovskite nanostructures suitable for optoelectronic, photoluminescent and electrochemical properties*. *Scientific Reports*, 2024. **14**(1): p. 7415.
